# Supplementary material for: Endocytosis and Trafficking of Heparan Sulfate Proteoglycans in Triple-Negative Breast Cancer Cells Unraveled with a Polycationic Peptide
Source: PubMed Central journal article supplement (PMC7663799; doi:10.3390/ijms21218282), 2020-11-05
Supplement: ijms-21-08282-s001.pdf [file ijms-21-08282-s001.pdf]

## Supplementary Materials

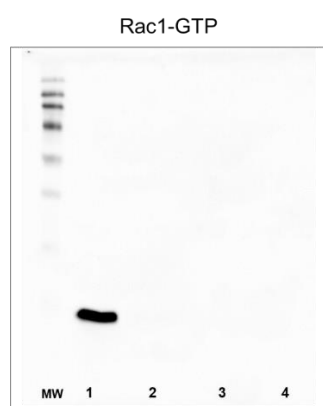

**Figure 1SM.** Pull-down assay of Rac1-GTP in MDA-MB-231. Lane 1: positive control; lane 2: negative control, lane 3: untreated cells (control); lane 4: cells treated with NT4.
